# Supplementary material
Source: Research Square preprint supplement (doi:10.21203/rs.3.rs-9313493/v1)
Supplement: Supplementary file 1 [file 6928ee4771a4acce70bd1fcd.docx]

**Supplementary Informations**

**Multi‑omics elucidation of gut microbiota‑driven regulation of muscle fatty acid composition in common carp**

**Jingquan Li1#,** **Xiaochang Huang2#, Yun Ye1#,** **Yuanxiu Wang1, Zuqing Yang3, Qiubai Zhou3, Hailin Xia1, Wanchang Zhang2*, Hui Yang****1***

**1College of Bioscience and Bioengineering, Jiangxi Agricultural University, Nanchang, 330045, China**

**2School of Life Sciences, Nanchang University, Nanchang, 33001, China**

**3Key Laboratory of Featured Hydrobios Nutritional Physiology and Healthy Breeding,** **Nanchang, 330045, China**

**#** **These authors contributed equally: Jingquan Li, Xiaochang Huang, Yun Ye.**

***Corresponding: yhuijxau@hotmail.com, wanchangzhang@ncu.edu.cn**


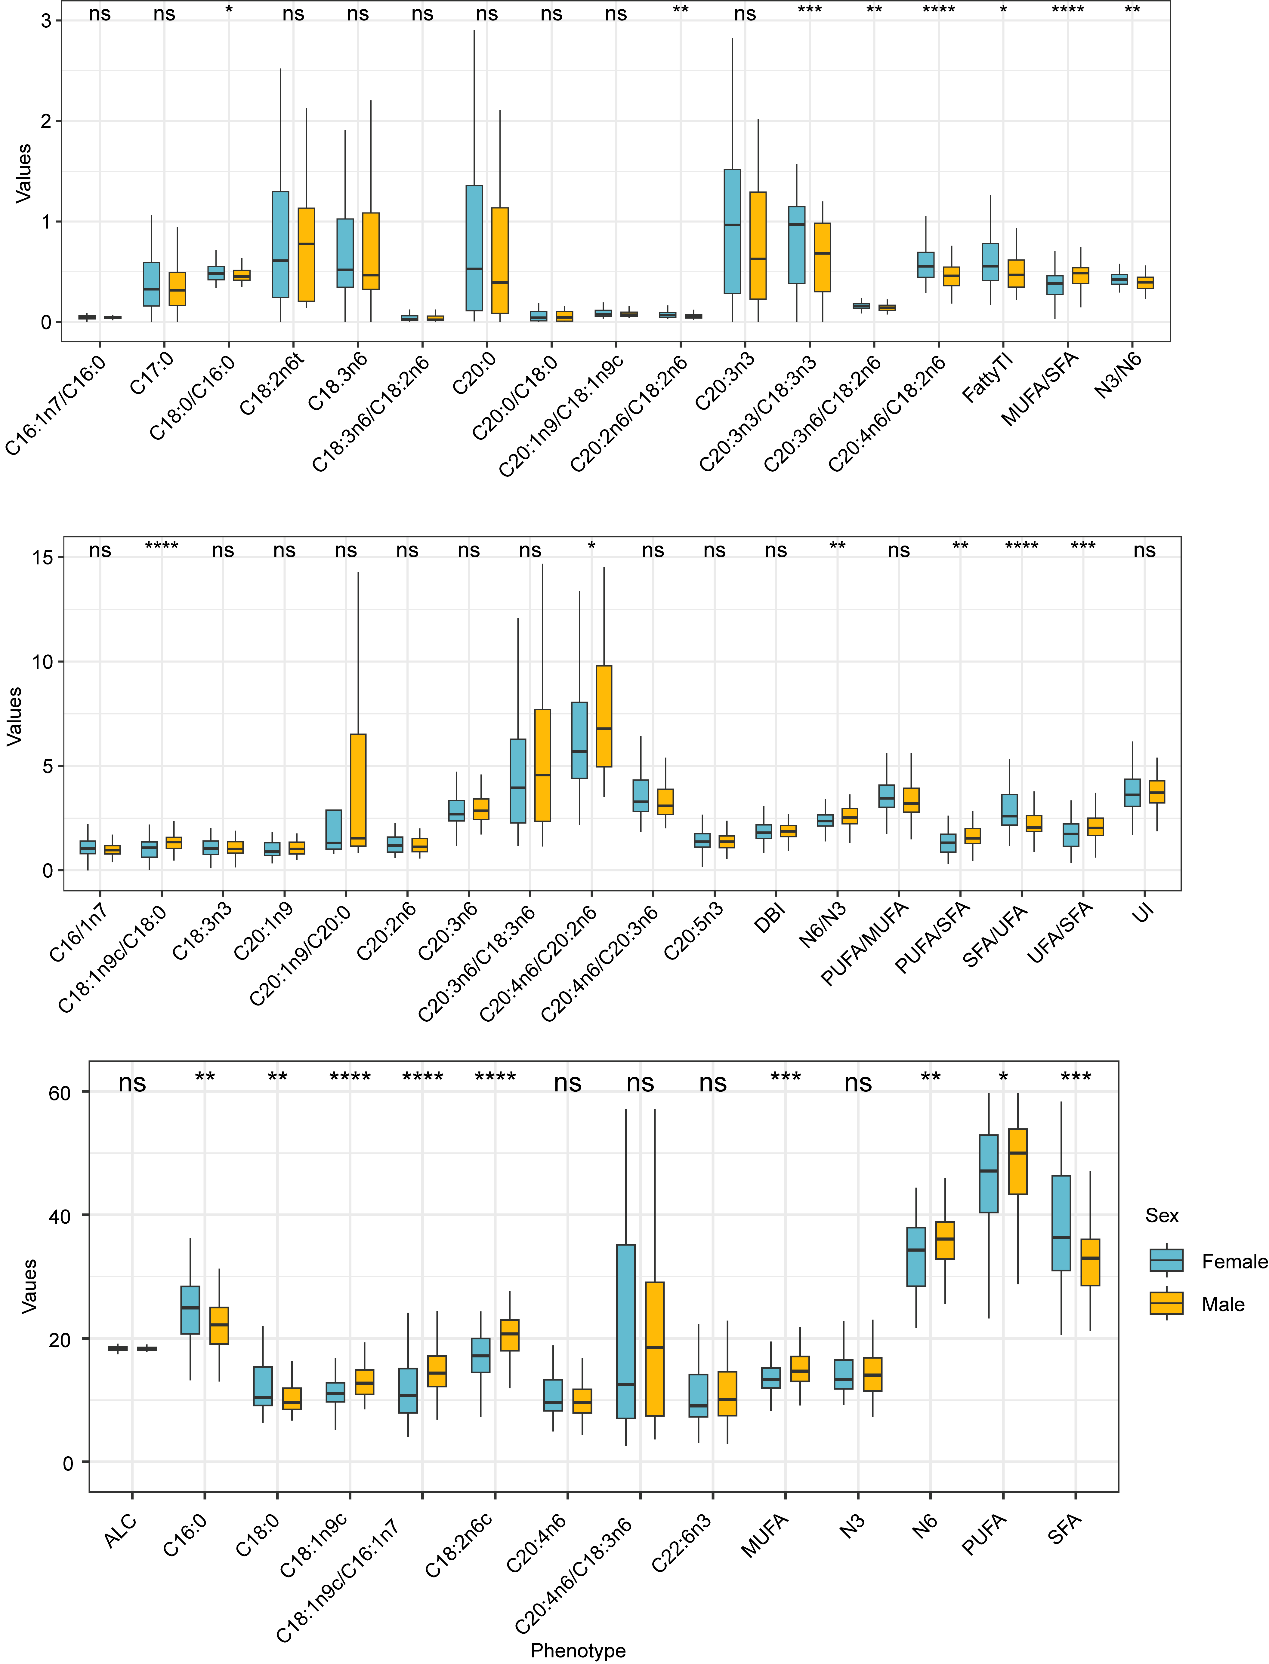


**Supplementary figure 1.** **Comparison of fatty acid composition between sexes.** Differential abundance between female and male fish was assessed using the Wilcoxon rank-sum test. Significance levels are denoted as follows: “*” indicated 0.01 < P < 0.05, “**” indicates 0.001< P < 0.01, and “***” indicates P < 0.001. The boxplots depict the 25th and 75th percentiles, the median (middle horizontal line), and whiskers extend to points within 1.5 times the interquartile range.


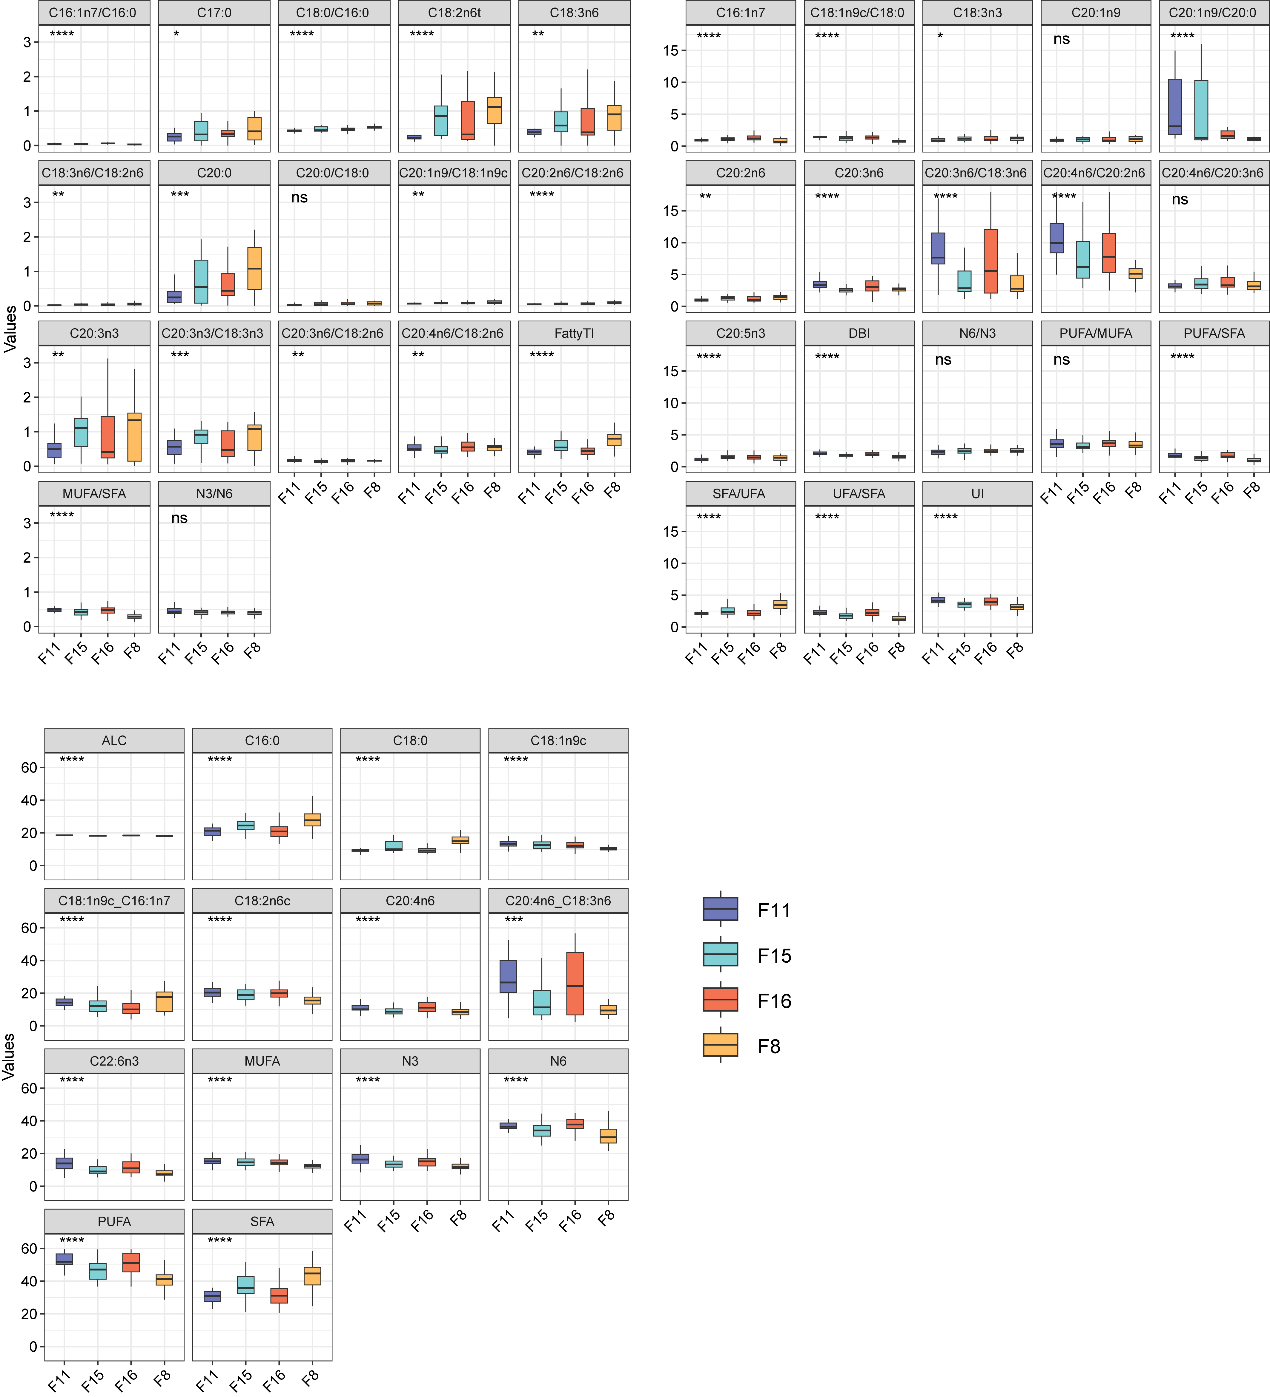


**Supplementary figure 2. Fatty acid profiles of different family populations.** Boxplots display the distribution of fatty acids, with significant differences across populations assessed by the Kruskal-Wallis test and marked with asterisks (“*”: 0.01 < P < 0.05, “**”: 0.001 < P < 0.01, “***”: P < 0.001). Boxplot styling is consistent with Supplementary Fig. 2.


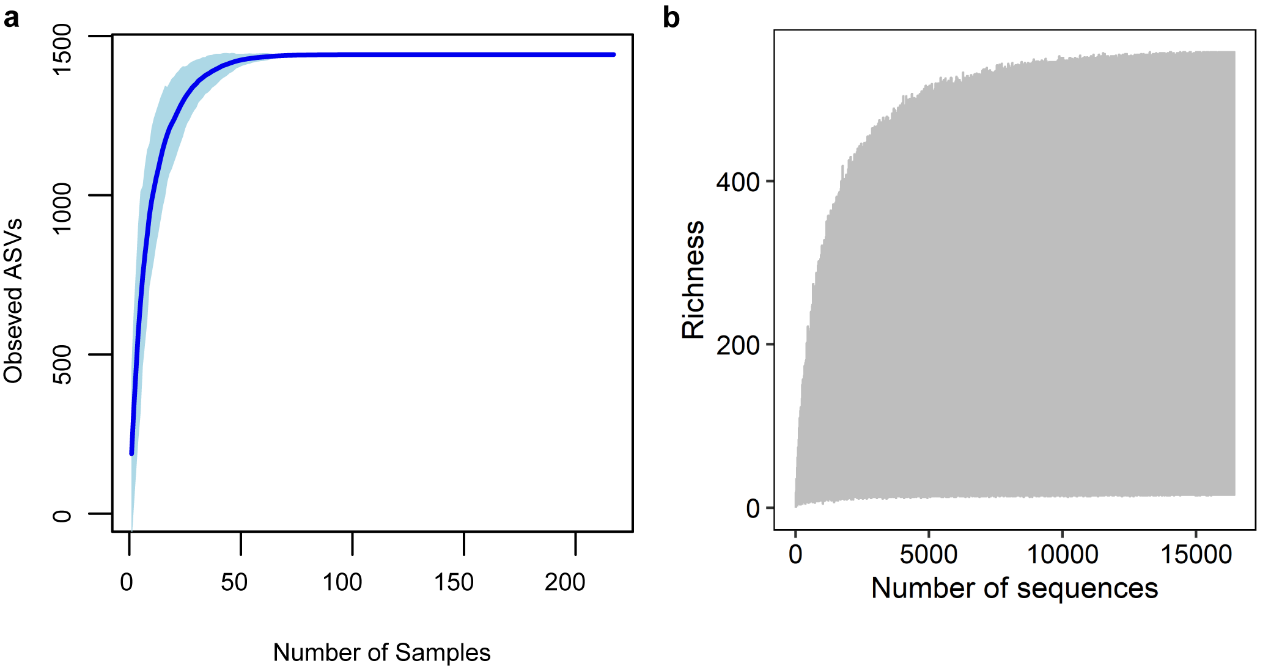


**Supplementary figure 3. Rarefaction curves assessing sampling adequacy and sequencing depth.** (a) Rarefaction curves of amplicon sequence variants (ASVs) for all 217 individual samples, indicating the adequacy of sampling effort. (b) Rarefaction curves of ASVs grouped by sequencing depth, demonstrating the relationship between sequencing depth and microbial diversity observed.


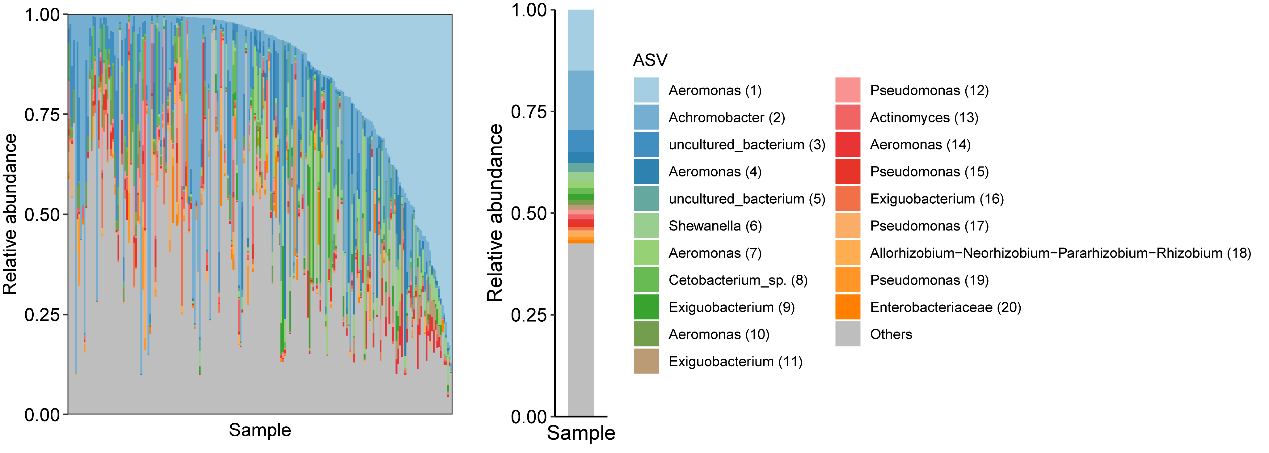


**Supplementary figure 4.** **Microbial composition across samples at the amplicon sequence variants (ASV) level.** Relative abundance of microbial taxa at the ASV level across the tested samples. The top 20 most abundant taxa are displayed; the “Others” category represents the combined relative abundance of remaining taxa. The bar plot on the right depicts the mean relative abundance across


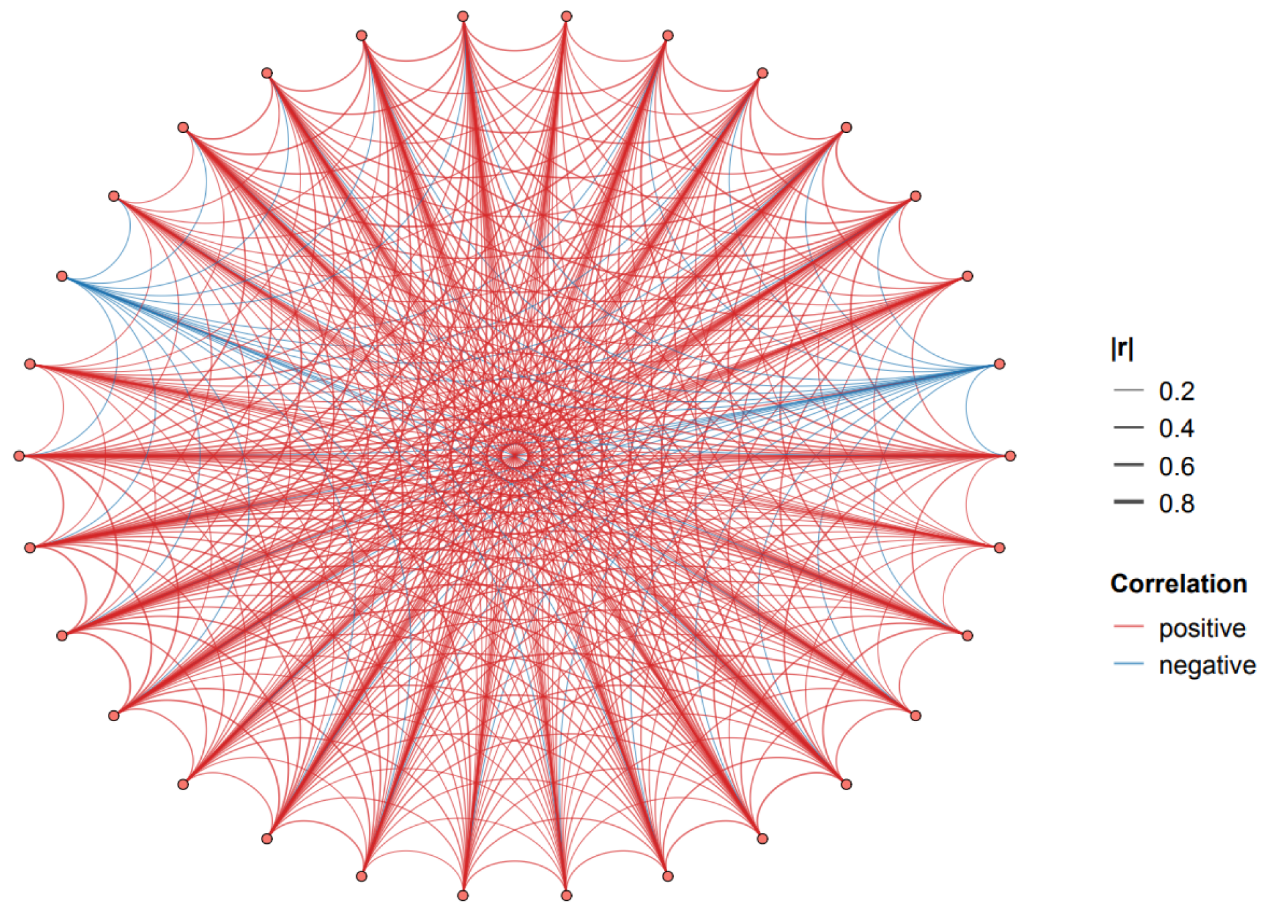


**Supplementary figure 5. Co-occurrence network of the top 30 genera significantly associated with fatty acid phenotypes.** The network is constructed based on Spearman correlation coefficients between genera. Edge width corresponds to the absolute value of the correlation coefficient, with red and blue edges representing positive and negative correlations, respectively.


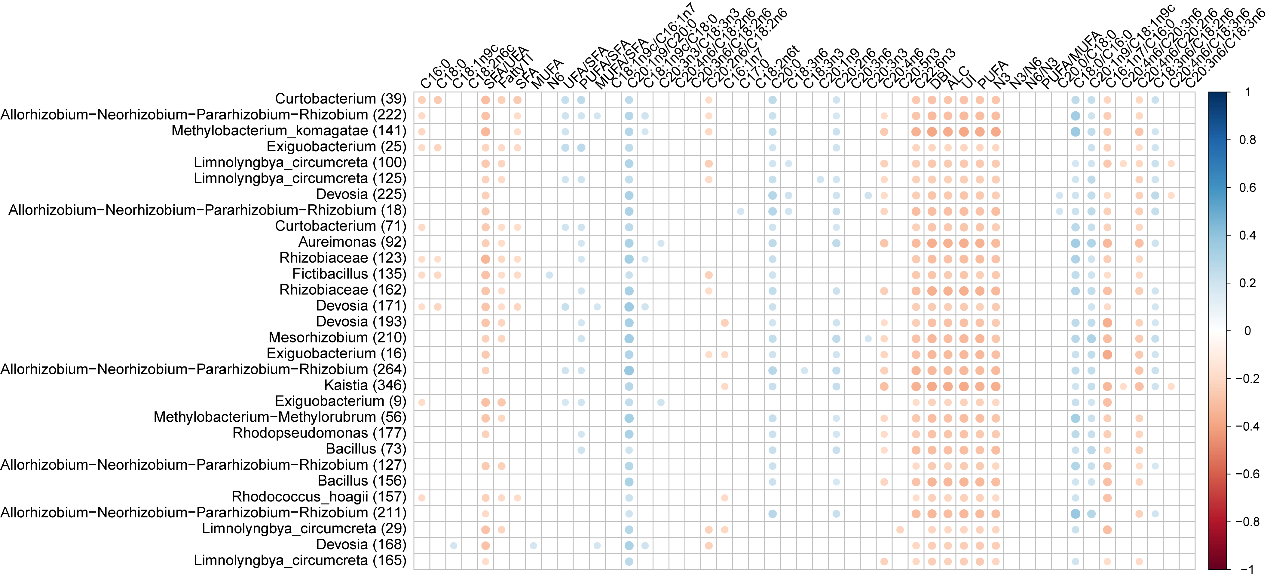


**Supplementary figure 6. Correlations between microbial amplicon sequence variants (ASVs) and fatty acid phenotypes.** The heatmap depicts the Spearman correlation coefficients. Significant correlations (q < 0.2) are denoted by solid circles, the size of which is proportional to the absolute value of the correlation coefficient.


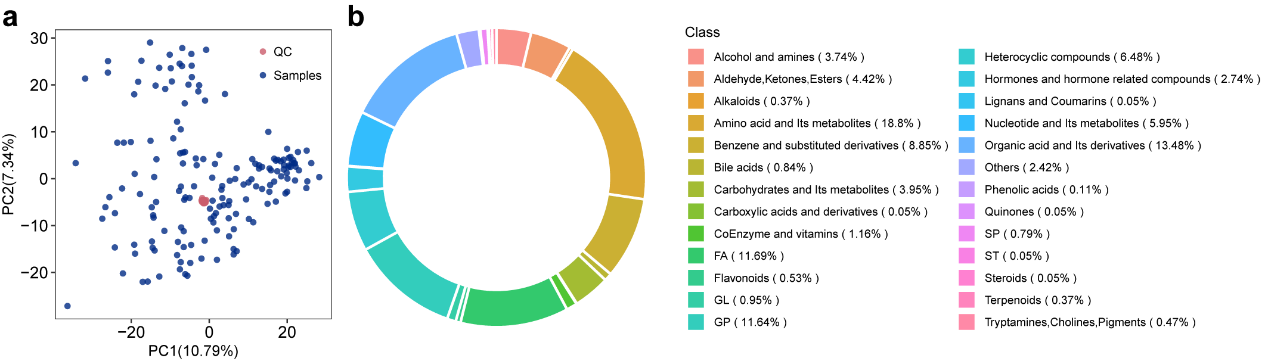


**Supplementary figure 7. Serum metabolome profiling of Hebao red carps.** (a) Principal component analysis plot showing the distribution of experimental samples (blue dots) and quality control (QC) samples (red dots). (b) Classification and composition of the identified serum metabolites.


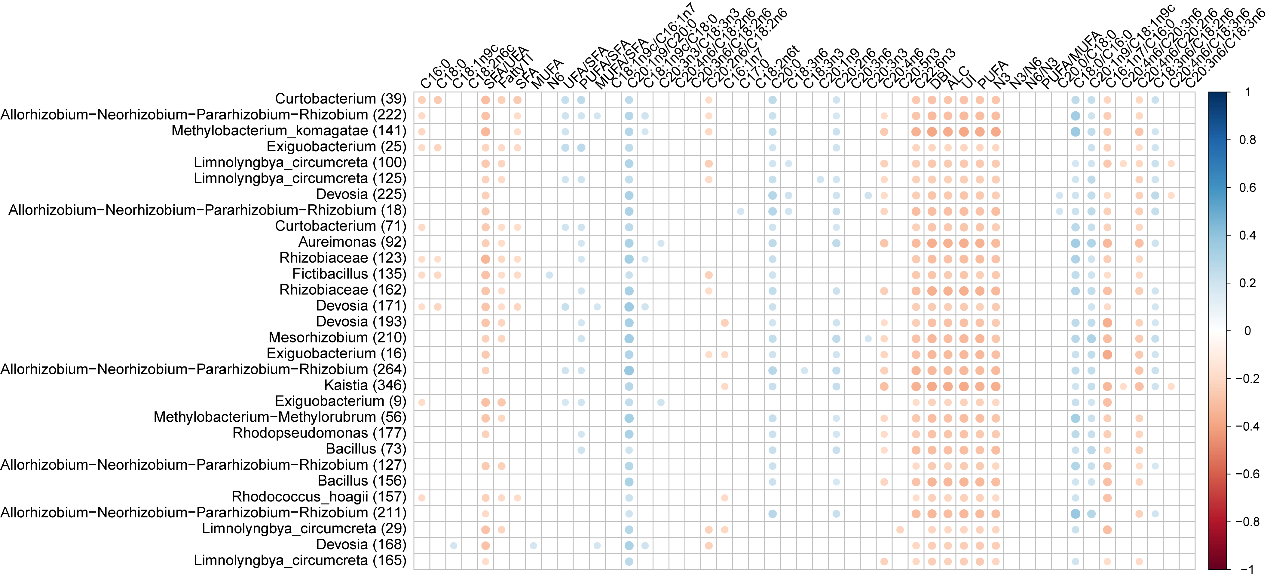


**Supplementary figure 8. Mediation analysis based on Carnitine C8:0 metabolites.** P-values for the natural indirect effects was derived from pairwise weighted Carnitine C8:0 metabolitesmediation models. The red dashed vertical line indicates the significance threshold of *P* < 0.05; points to the right of this line represent statistically significant associations. Colors distinguish the different fatty acid phenotypes that were significant in the mediation effect model of specific bacterial genera.


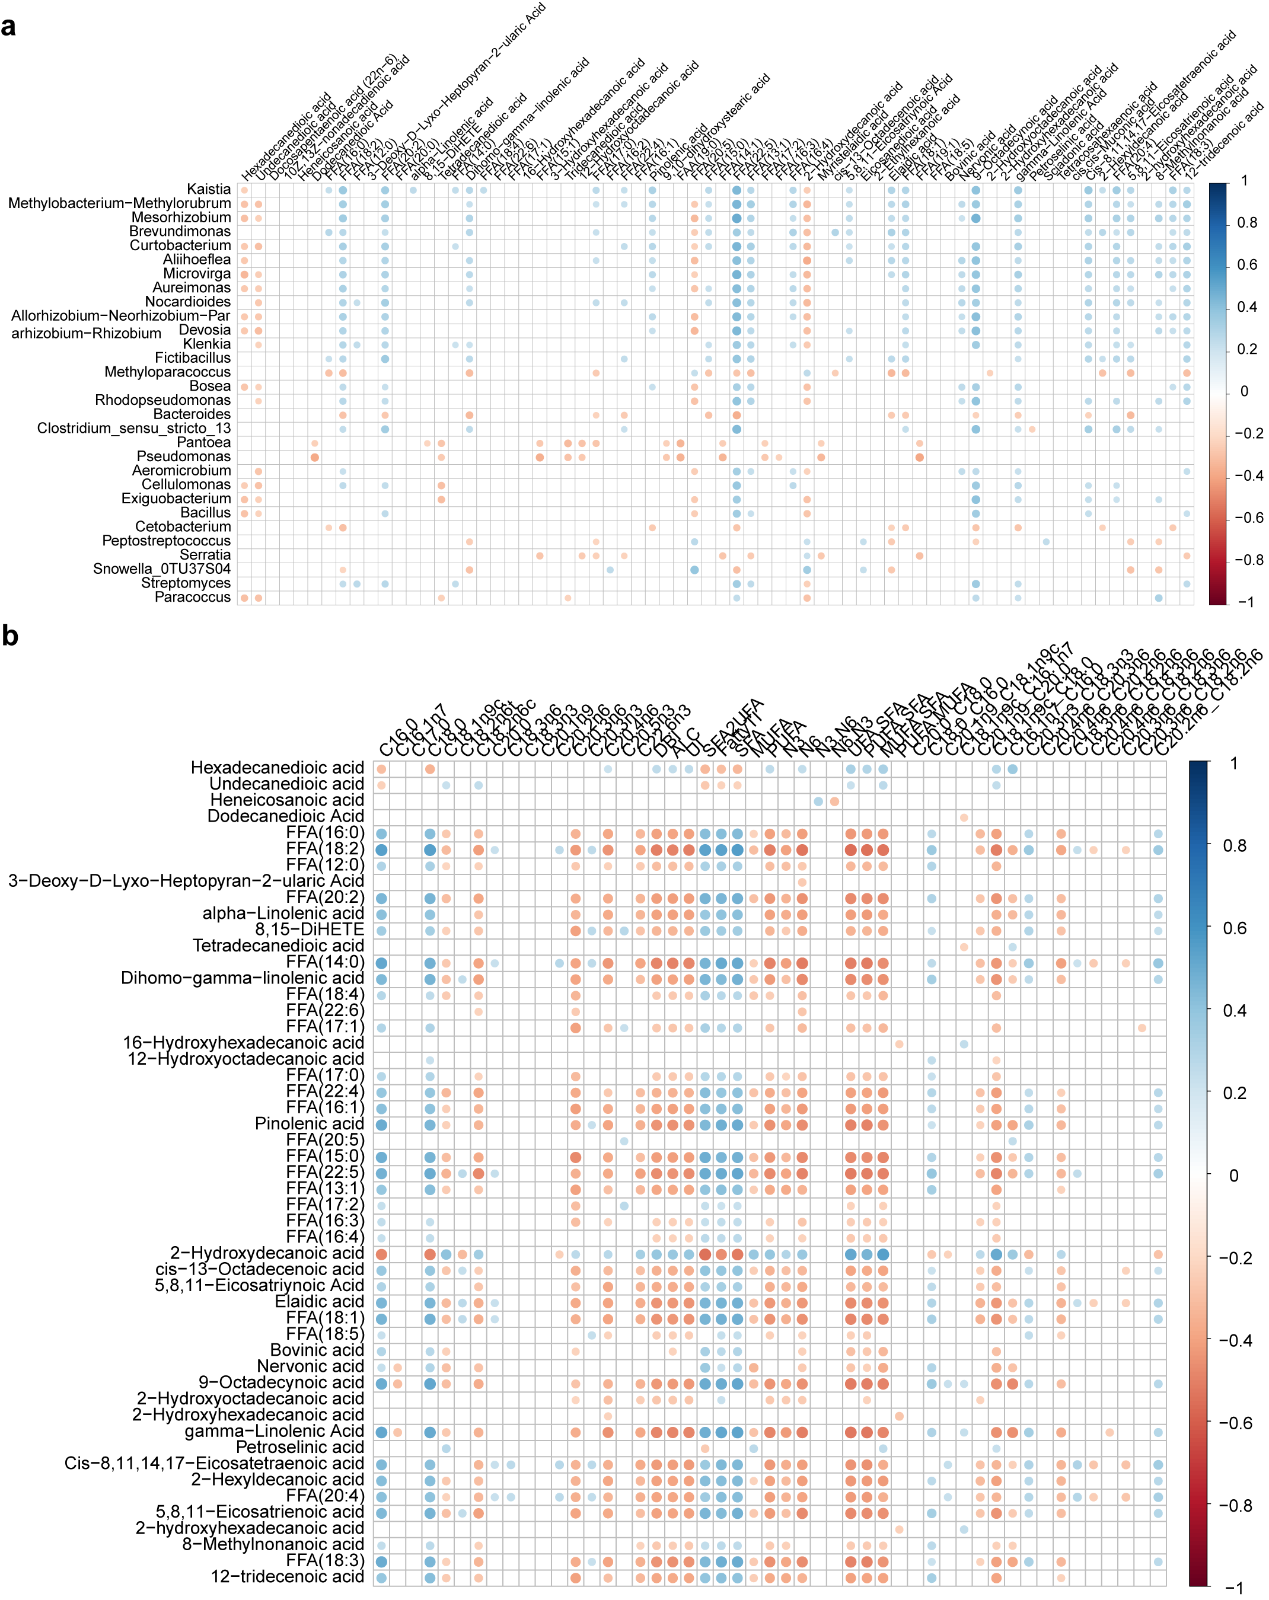


**Supplementary figure 9.** **Associations between free fatty acids (FFAs), gut microbiota genera, and muscle fatty acids.** (a) Correlation analysis of FFAs with the relative abundance of microbial genera. (b) Correlation heatmap between FFAs and muscle fatty acid content. Significant correlations (q < 0.05) are marked with solid circles, the size of which is proportional to the Spearman correlation coefficient.


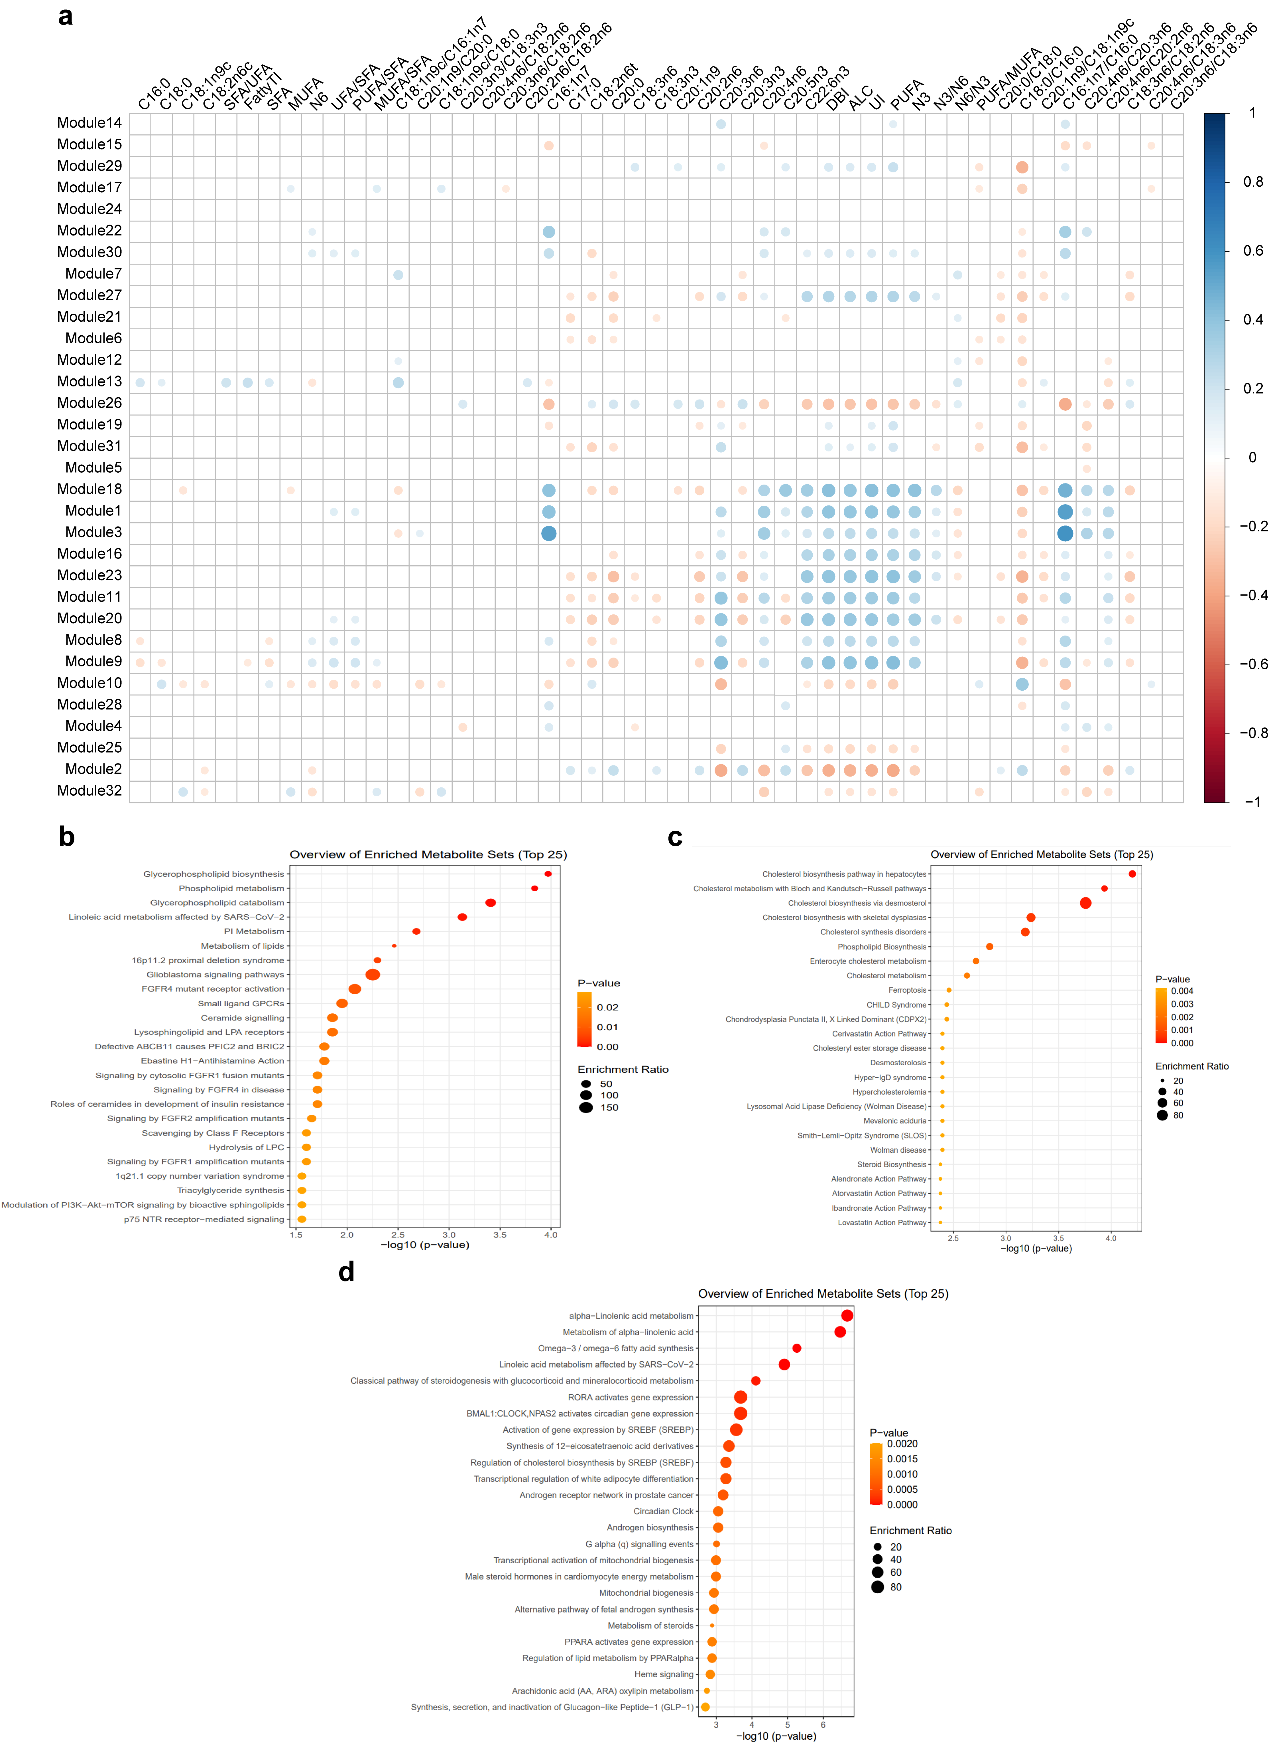


**Supplementary figure 10. Serum metabolite modules and their associations with fatty acids.** (a) Correlation analysis between the 32 metabolite modules identified by Weighted gene co-expression network analysis (WGCNA) and fatty acid phenotypes. Representative enriched metabolic pathways for (b) Module 1, (c) Module 3, and (d) Module 2 are shown.(a) The correlation plot show the correlation between the 32 WGCNA modules and fatty acid phenotypes. The dot plots display the significantly enriched metabolic pathways for (b) Module 1, (c) Module 3, and (d) Module 2.
